# Supplementary material
Source: MDPI journal article supplement (https://www.mdpi.com/1999-4907/14/6/1089)
Supplement: s1 [file s1]

# **Taxonomic Description and Complete Genome Sequencing of *Pseudomonas silvicola* sp. nov. Isolated from *Cunninghamia lanceolata***

**\*Corresponding author**

Email: xujinzhu@sinogaf.cn (J.X.); qincs@sinogaf.cn (C.Q.)

## Supplementary Materials

**Supplementary Figure S1.** Neighbor-joining phylogenetic tree based on concatenated 16S rRNA-gyrB-rpoB-rpoD sequences of T1-3-2<sup>T</sup> and the related *Pseudomonas* species. A multilocus sequence analysis (MLSA) with four concatenated four genes (16S rRNA (1421 bp), gyrB (908 bp), rpoB (1123 bp) and rpoD (776 bp) was performed using a Maximum Likelihood (ML) method. ML was implemented on the CIPRES Science Gateway portal using RAxML-HPG BlackBox 8.2.10, employing a GTRGAMMA substitution model with 1000 bootstrap replicates.

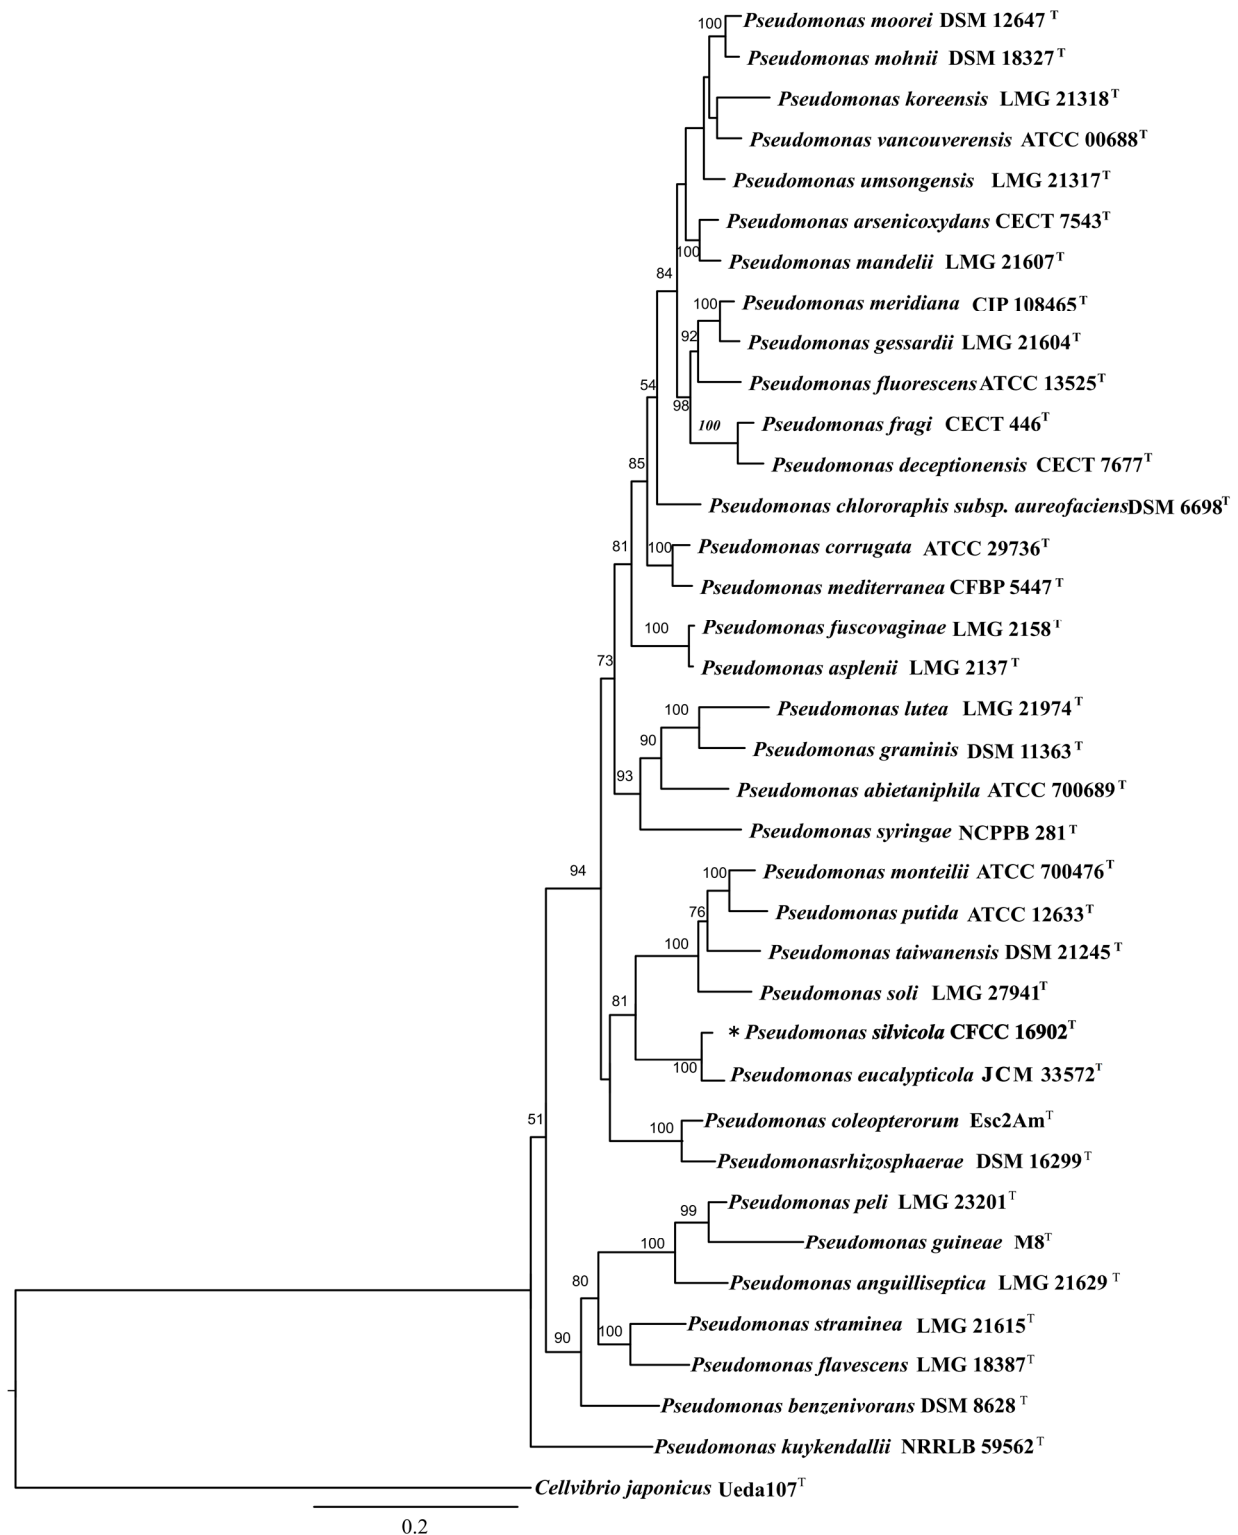

**Supplementary Figure S2.** Clusters of Orthologous Groups of proteins (COGs) annotation (A). Clusters of Gene Ontology (GO) annotation (B). Clusters of KEGG annotation (C). Gene count distributions of carbohydrate-active enzyme families. GH glycoside hydrolases, GT glycosyl transferases, PL polysaccharide lyases, CE carbohydrate esterases, CBM carbohydrate-binding modules, AA auxiliary activities (D).

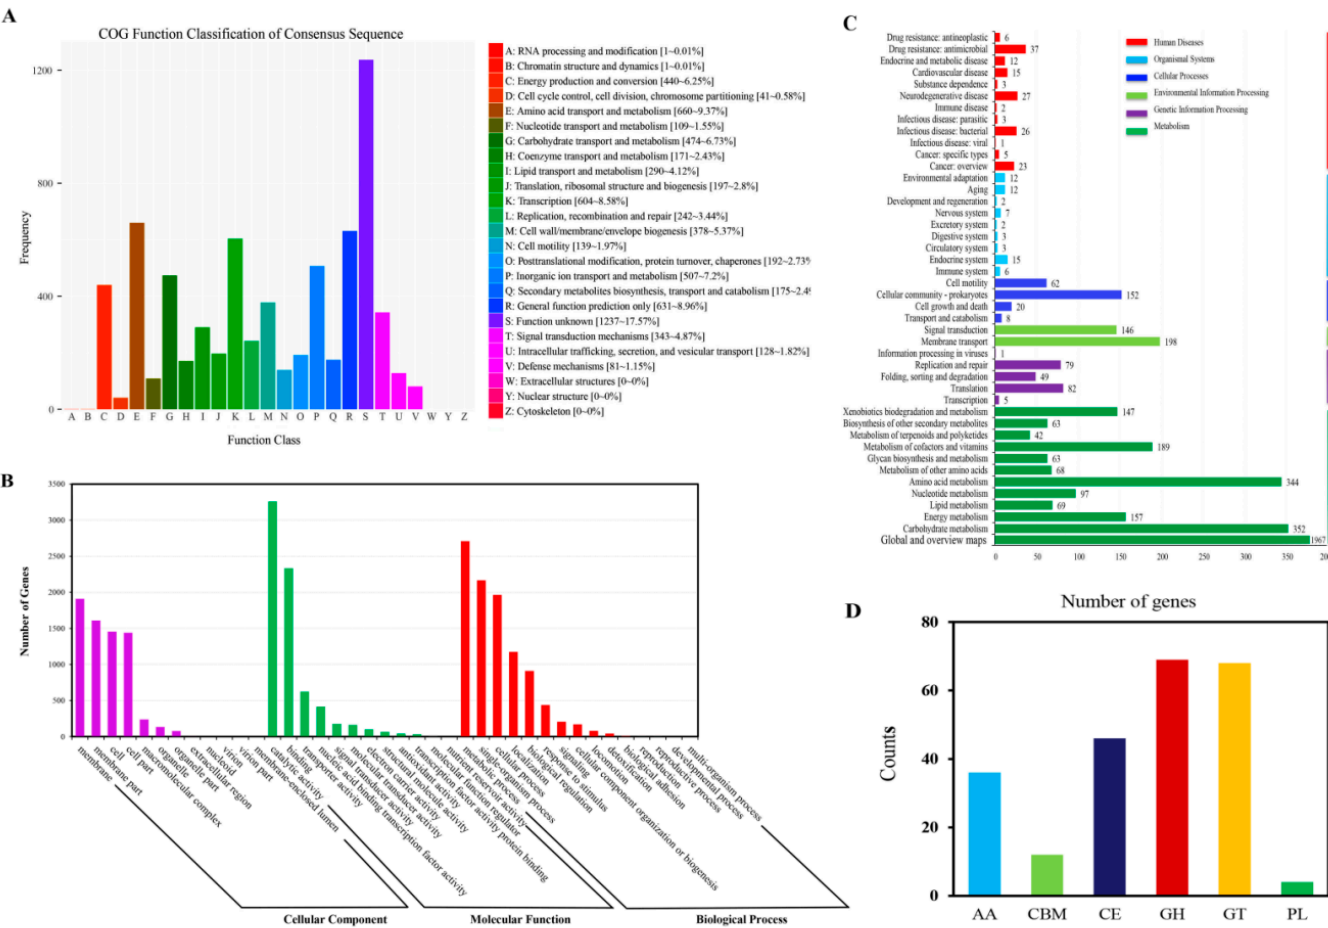

**Table S1.** Accession numbers were used in phylogenetic analysis based on the 16S rRNA.

| Name                          | Strain                         | Accession       |
|-------------------------------|--------------------------------|-----------------|
| <i>P. silvicola</i>           | <b>T1-3-2<sup>T</sup></b>      | <b>OM920535</b> |
| <i>P. vancouverensis</i>      | <b>ATCC 700688<sup>T</sup></b> | <b>AJ011507</b> |
| <i>P. eucalypticola</i>       | <b>NP-1<sup>T</sup></b>        | <b>MN238862</b> |
| <i>P. moorei</i>              | <b>RW10<sup>T</sup></b>        | <b>AM293566</b> |
| <i>P. izuensis</i>            | <b>IzPS43_3003<sup>T</sup></b> | <b>MN865785</b> |
| <i>P. koreensis</i>           | <b>Ps 9-14<sup>T</sup></b>     | <b>AF468452</b> |
| <i>P. kribbensis</i>          | 46-2 <sup>T</sup>              | CP029608        |
| <i>P. atacamensis</i>         | M7D1 <sup>T</sup>              | SSBS01000008    |
| <i>P. glycinae</i>            | MS586 <sup>T</sup>             | MG692779        |
| <i>P. reinekei</i>            | Mt-1 <sup>T</sup>              | AM293565        |
| <i>P. jessenii</i>            | DSM 17150 <sup>T</sup>         | NIWT01000013    |
| <i>P. moraviensis</i>         | CCM 7280 <sup>T</sup>          | AY970952        |
| <i>P. umsongensis</i>         | DSM 16611 <sup>T</sup>         | NIWU01000003    |
| <i>P. mohnii</i>              | DSM 18327 <sup>T</sup>         | FNRV01000001    |
| <i>P. granadensis</i>         | LMG 27940 <sup>T</sup>         | LT629778        |
| <i>P. baetica</i>             | a390 <sup>T</sup>              | FM201274        |
| <i>P. parafulva</i>           | NBRC 16636 <sup>T</sup>        | BBIU01000051    |
| <i>P. neuropathica</i>        | P155 <sup>T</sup>              | LR797591        |
| <i>P. laurylsulfativorans</i> | AP3_22 <sup>T</sup>            | MF554631        |
| <i>P. fulva</i>               | NBRC 16637 <sup>T</sup>        | BBIQ01000036    |
| <i>P. batumici</i>            | UCM B-321 <sup>T</sup>         | JXDG01000105    |
| <i>P. atagonensis</i>         | PS14 <sup>T</sup>              | MN396717        |
| <i>P. mucoides</i>            | P154a <sup>T</sup>             | LR797589        |
| <i>P. graminis</i>            | DSM 11363 <sup>T</sup>         | Y11150          |
| <i>P. rhizosphaerae</i>       | DSM 16299 <sup>T</sup>         | CP009533        |
| <i>P. lutea</i>               | DSM 17257 <sup>T</sup>         | JRMB01000004    |
| <i>P. baltica</i>             | MBT-2 <sup>T</sup>             | MW377590        |
| <i>P. helmanticensis</i>      | OHA11 <sup>T</sup>             | HG940537        |
| <i>P. massiliensis</i>        | CB1 <sup>T</sup>               | CCYK01000003    |
| <i>P. coleopterorum</i>       | Esc2Am <sup>T</sup>            | KM888184        |
| <i>P. laurylsulfatiphila</i>  | AP3_16                         | KY462012        |
| <i>P. juntendi</i>            | BML3 <sup>T</sup>              | MK680061        |
| <i>P. akapageensis</i>        | PS24 <sup>T</sup>              | MN382268        |
| <i>P. defluvii</i>            | WCHP16 <sup>T</sup>            | KY979145        |
| <i>P. kuykendallii</i>        | NRRL B-59562 <sup>T</sup>      | FNNU01000014    |

**Table S2.** Accession numbers of the sequences of the type strains of different *Pseudomonas* species used in the MLSA phylogenetic analysis.

| Species                                              | Type strain               | 16S rRNA gene              | Gene and Accession number             |                                     |                            |
|------------------------------------------------------|---------------------------|----------------------------|---------------------------------------|-------------------------------------|----------------------------|
|                                                      |                           |                            | <i>gyrB</i>                           | <i>rpoB</i>                         | <i>rpoD</i>                |
| <i>P. silvicola</i>                                  | T1-3-2 <sup>T</sup>       | OM920535                   | ON243870                              | ON364553                            | ON364554                   |
| <i>P. eucalypticola</i>                              | NP-1 <sup>T</sup>         | MN238862                   | MN233594                              | MN233595                            | MN233596                   |
| <i>P. coleopterorum</i>                              | Esc2Am <sup>T</sup>       | KM888184                   | FNTZ01000001<br>1:4674081-<br>4676604 | KM888186                            | KM888187                   |
| <i>P. graminis</i>                                   | DSM 11363 <sup>T</sup>    | Y11150                     | FN554187                              | AJ717429                            | FN554469                   |
| <i>P. kuykendallii</i>                               | NRRL B-59562 <sup>T</sup> | JF749828                   | LT615253                              | FNNU01000011<br>:5421-9555          | LMG 26364                  |
| <i>P. lutea</i>                                      | LMG 21974 <sup>T</sup>    | AY364537                   | FN554198                              | FN554738                            | FN554480                   |
| <i>P. mohnii</i>                                     | DSM 18327 <sup>T</sup>    | AM293567                   | AM293561                              | FN554741                            | FN554487                   |
| <i>P. moorei</i>                                     | DSM 12647 <sup>T</sup>    | AM293566                   | TAM293560                             | FN554742                            | FN554489                   |
| <i>P. rhizosphaerae</i>                              | DSM 16299 <sup>T</sup>    | CP009533                   | FN554224                              | FN554755                            | FN554510                   |
| <i>P. umsongensis</i>                                | LMG 21317 <sup>T</sup>    | NR025227                   | FN554231                              | FN554763                            | FN554516                   |
| <i>P. Vancouverensis</i>                             | ATCC 00688 <sup>T</sup>   | AJ011507                   | FN554232                              | NZ_LT629803:<br>6114764-<br>6115679 | FN554517                   |
| <i>Cellvibrio japonicus</i>                          | Ueda107 <sup>T</sup>      | NC010995:8070<br>88-808555 | NC010995:398<br>0-6400                | NC010995:8218<br>13-825898          | NC010995:89<br>5987-896726 |
| <i>P. fluorescens</i>                                | ATCC 13525 <sup>T</sup>   | D84013                     | D86016                                | AJ717451                            | AB039545                   |
| <i>P. gessardii</i>                                  | LMG 21604 <sup>T</sup>    | AF074384                   | FN554186                              | AJ717438                            | FN554468                   |
| <i>P. meridiana</i>                                  | CIP 108465 <sup>T</sup>   | AJ537602                   | FN554203                              | FN554740                            | FN554485                   |
| <i>P. fragi</i>                                      | CECT 446 <sup>T</sup>     | AF094733                   | FN554184                              | AJ717444                            | FN554466                   |
| <i>P. mandelii</i>                                   | LMG 21607 <sup>T</sup>    | AF058286                   | FN554200                              | AJ717435                            | FN554482                   |
| <i>P. deceptionensis</i>                             | CECT 7677 <sup>T</sup>    | GU936597                   | HE800476                              | HE800510                            | GU936596                   |
| <i>P. arsenicoxydans</i>                             | CECT 7543 <sup>T</sup>    | FN645213                   | FN645139                              | HE800503                            | FN645160/HE<br>800488      |
| <i>P. koreensis</i>                                  | LMG 21318 <sup>T</sup>    | AF468452                   | FN554194                              | FN554737                            | FN554476                   |
| <i>P. corrugata</i>                                  | ATCC 29736 <sup>T</sup>   | D84012                     | AB039460                              | AJ717487                            | AB039566                   |
| <i>P. mediterranea</i>                               | CFBP 5447 <sup>T</sup>    | AF386080                   | AM084678                              | AJ717449                            | AM084337                   |
| <i>P. chlororaphis</i> subsp.<br><i>aureofaciens</i> | DSM 6698 <sup>T</sup>     | AY509898                   | FN554172                              | AJ717426                            | FN554453                   |
| <i>P. asplenii</i>                                   | LMG 2137 <sup>T</sup>     | AB021397                   | AB039455                              | AJ717432                            | AB039593                   |
| <i>P. fuscovaginae</i>                               | LMG 2158 <sup>T</sup>     | FJ483519                   | FN554185                              | AJ717433                            | FN554467                   |
| <i>P. syringae</i>                                   | NCPPB 281 <sup>T</sup>    | DQ318866                   | AB039428                              | FN554759                            | AB039516                   |
| <i>P. abietaniphila</i>                              | ATCC 700689 <sup>T</sup>  | AJ011504                   | FN554166                              | AJ717416                            | FN554447                   |
| <i>P. monteilii</i>                                  | ATCC 700476 <sup>T</sup>  | AF064458                   | FN554205                              | AJ717455                            | FN554488                   |
| <i>P. putida</i>                                     | ATCC 12633 <sup>T</sup>   | D84020                     | AB039451                              | AJ717474                            | AB039581                   |
| <i>P. soli</i>                                       | LMG 27941 <sup>T</sup>    | HF930598                   | LN851840                              | HF930596                            | HF930597                   |

|                           |                        |          |                       |          |          |
|---------------------------|------------------------|----------|-----------------------|----------|----------|
| <i>P. taiwanensis</i>     | DSM 21245 <sup>T</sup> | EU103629 | FJ418634/HE80<br>0487 | HE577797 | HE577796 |
| <i>P. straminea</i>       | LMG 21615 <sup>T</sup> | D84023   | AB039410              | FN554758 | AB039600 |
| <i>P. flavescens</i>      | LMG 18387 <sup>T</sup> | U01916   | FN554183              | AJ717468 | FN554465 |
| <i>P. benzenivorans</i>   | DSM 8628 <sup>T</sup>  | FM208263 | HE800472              | HE800506 | HE800490 |
| <i>P. anguilliseptica</i> | LMG 21629 <sup>T</sup> | X99540   | FN554168              | AJ717417 | FN554449 |
| <i>P. peli</i>            | LMG 23201 <sup>T</sup> | AM114534 | FN554217              | FN554750 | FN554501 |
| <i>P. guineae</i>         | M8 <sup>T</sup>        | AM491810 | FN554189              | FN554734 | FN554471 |

**Table S3** Type strains and their genome sources in the phylogenomic tree

| Species                                 | Deposit                 | GenBank assembly     |              |              |
|-----------------------------------------|-------------------------|----------------------|--------------|--------------|
|                                         |                         | accession            | Percent G+C  | No. proteins |
| <b><i>Pseudomonas silvicola</i></b>     | T1-3-2 <sup>T</sup>     | CP093280             | 61.65        | 8117         |
| <i>Pseudomonas reidholzensis</i>        | CCOS 865                | GCA_900536025        | 64.09        | 5441         |
| <i>Pseudomonas ovata</i>                | F51 <sup>T</sup>        | GCA_003131185        | 61.94        | 5749         |
| <i>Pseudomonas chlororaphis</i>         |                         |                      |              |              |
| subsp. <i>aurantiaca</i>                | DSM 19603               | GCF_003851835        | 62.86        | 6297         |
| <i>Pseudomonas nabeulensis</i>          | E10B <sup>T</sup>       | GCA_004682045        | 60.29        | 6049         |
| <i>Pseudomonas reinekei</i>             | MT1                     | GCA_001945365        | 59.17        | 5603         |
| <b><i>Pseudomonas eucalypticola</i></b> | <b>NP-1<sup>T</sup></b> | <b>GCA_013374995</b> | <b>63.12</b> | <b>5596</b>  |
| <i>Pseudomonas kribbensis</i>           | KCTC 32541 <sup>T</sup> | GCF_003352185        | 60.55        | 5661         |
| <i>Pseudomonas moorei</i>               | DSM 12647               | GCF_900102045        | 59.66        | 5989         |
| <i>Pseudomonas tractae</i>              | SNU WT1                 | GCA_004214895        | 61.83        | 5033         |
| <i>Pseudomonas monteilii</i>            | DSM 14164               | GCA_000621245        | 61.49        | 5953         |
| <i>Pseudomonas moraviensis</i>          | LMG 24280               | GCF_900105805        | 60.17        | 5351         |
| <i>Pseudomonas koreensis</i>            | LMG 21318               | GCF_900101415        | 60.53        | 5467         |
| <i>Pseudomonas koreensis</i>            | JCM 14769               | GCA_014646955        | 60.58        | 5520         |
| <b><i>Pseudomonas rhizosphaerae</i></b> | <b>DSM 16299</b>        | <b>GCA_000761155</b> | <b>61.99</b> | <b>3893</b>  |
| <i>Pseudomonas glycinae</i>             | MS586                   | GCA_001594225        | 60.48        | 5674         |
| <b><i>Pseudomonas coleopterorum</i></b> | <b>LMG 28558</b>        | <b>GCA_900105555</b> | 62.03        | 4341         |
| <i>Pseudomonas orientalis</i>           | DSM 17489               | GCF_001439815        | 60.51        | 5471         |
| <i>Pseudomonas vancouverensis</i>       | LMG 20222               | GCF_900105825        | 60.11        | 5822         |
| <i>Pseudomonas izuensis</i>             | IzPS43_3003             | GCA_009861505        | 59.62        | 6149         |

**Table S4.** Functional categories bases on eggNOG of the protein-coding genes of the *Pseudomonas silvicola* sp. nov.

| Code | Description                                                  | CDS(%)       |
|------|--------------------------------------------------------------|--------------|
| A    | Translation, ribosomal structure and biogenesis              | 197 (2.80)   |
| B    | Transcription                                                | 604 (8.58)   |
| C    | Replication, recombination and repair                        | 242(3.44)    |
| D    | Cell cycle control, cell division, chromosome partitioning   | 41(0.58)     |
| E    | Posttranslational modification, protein turnover, chaperones | 192(2.73)    |
| F    | Cell wall/membrane/envelope biogenesis                       | 378(5.37)    |
| G    | Cell motility                                                | 139(1.97)    |
| H    | Inorganic ion transport and metabolism                       | 507(7.20)    |
| I    | Signal transduction mechanisms                               | 343(4.87)    |
| J    | Energy production and conversion                             | 440(6.25)    |
| K    | Carbohydrate transport and metabolism                        | 474 (6.73)   |
| L    | Amino acid transport and metabolism                          | 660 (9.37)   |
| M    | Nucleotide transport and metabolism                          | 109 (1.55)   |
| N    | Coenzyme transport and metabolism                            | 171 (2.43)   |
| O    | Lipid transport and metabolism                               | 290 (4.12)   |
| P    | Secondary metabolites biosynthesis, transport and catabolism | 175 (2.49)   |
| Q    | General function prediction only                             | 631 (8.96)   |
| S    | Intracellular trafficking,secretion,and vesicular transport  | 128 (1.82)   |
| T    | RNA processing and modification                              | 1 (0.01)     |
| U    | Chromatin structure and dynamics                             | 1 (0.01)     |
| V    | Defense mechanisms                                           | 81 (1.15)    |
| Z    | Function unknown                                             | 1237 (17.57) |

**Table S5** Genes related to carbohydrate-active enzymes (CAZymes) in *Pseudomonas silvicola* sp. nov.

| Family of enzymes | AA     | CBM   | CE     | GH     | GT     | PL    |
|-------------------|--------|-------|--------|--------|--------|-------|
| Number of genes   | 36     | 12    | 46     | 69     | 68     | 4     |
| Percentage (%)    | 15.32% | 5.11% | 19.57% | 29.36% | 28.94% | 1.70% |

CBM. Carbohydrate-Binding Module; GH. Glycoside Hydrolase; GT. Glycosyl Transferase; PL. Polysaccharide lyases; AA. Auxiliary Activity; CE. Carbohydrate Esterase.

**Table S6** CAZymes involved in plant and fungal cell wall degradation identified in *Pseudomonas silvicola* sp. nov. genome

| Substrate                               | Family enzymes            | Annotation                                                                  | Copy number |
|-----------------------------------------|---------------------------|-----------------------------------------------------------------------------|-------------|
| Endo- $\beta$ -1,4-glucanase            | GH5                       | endo- $\beta$ -1,4-glucanase / cellulase (EC 3.2.1.4)                       | 1           |
| 6-phospho- $\beta$ -glucosidase         | GH1/GH4                   | (6-phospho- $\beta$ -glucosidase EC 3.2.1.86)                               | 3           |
| $\alpha$ -glucosidase                   | GH13/GH31/GH4             | $\alpha$ -glucosidase (EC 3.2.1.20)                                         | 11          |
| Endoglucanases                          | GH74                      | endoglucanase (EC 3.2.1.4)                                                  | 1           |
| Beta-1-3-glucan                         | GH1                       | endo-1.3- $\beta$ -glucosidase (EC3.2.1.39)                                 | 1           |
| oligoxyloglucan                         | GH74                      | oligoxyloglucan reducing end-specific cellobiohydro-<br>lase (EC 3.2.1.150) | 3           |
| Cellulose                               | GH5                       | endo- $\beta$ -1,4-glucanase / cellulase (EC 3.2.1.4)                       | 1           |
| Pectin                                  | GH28                      | polygalacturonase (EC 3.2.1.15)                                             | 1           |
| Polysaccharides                         | GH13                      | $\alpha$ -amylase (EC 3.2.1.1)                                              | 9           |
| Polysaccharides                         | GH15                      | glucoamylase (EC 3.2.1.3)                                                   | 2           |
| Xylan/arabinoxylan/arabi-<br>nogalactan | CE1                       | feruloyl esterase (EC 3.1.1.73)                                             | 27          |
|                                         | CE1/ CE3/ CE4/CE5/<br>CE7 | acetyl xylan esterase (EC 3.1.1.72)                                         | 18          |
| chitin                                  | CE4                       | chitin deacetylase (EC 3.5.1.41)                                            | 4           |

**Table S7** Secondary metabolite gene clusters identified in the *Pseudomonas silvicola* sp. nov. using antiSMASH v. 5.0.0.

| Cluster | Type             | From    | To      | Size  | Most similar known cluster | Similarity |
|---------|------------------|---------|---------|-------|----------------------------|------------|
| r1c1    | arylpolyene      | 432895  | 476490  | 43596 | APE Vf                     | 40%        |
| r1c2    | NRPS-like        | 1115614 | 1156761 | 41148 | Mangotoxin                 | 71%        |
| r1c3    | NRPS-like        | 1749641 | 1794415 | 44775 |                            |            |
| r1c4    | NAGGN            | 2661155 | 2675928 | 14774 |                            |            |
| r1c5    | NRPS             | 3771272 | 3813511 | 42240 |                            |            |
| r1c6    | hserlactone,NRPS | 4587333 | 4646179 | 58847 |                            |            |
| r1c7    | LAP              | 4668739 | 4690735 | 21997 |                            |            |
| r1c8    | NRPS             | 5338387 | 5403272 | 64886 | Orfamide                   | 35%        |
| r1c9    | NRPS             | 5780918 | 5857722 | 76805 | Pyoverdine                 | 16%        |
| r1c10   | CDPS             | 6185239 | 6205976 | 20738 |                            |            |
| r1c11   | amglyccycl       | 6447315 | 6470458 | 23144 | Acarbose                   | 7%         |
| r1c12   | NRPS             | 6518068 | 6581825 | 63758 | Enterobactin               | 16%        |
| r1c13   | lassopeptide     | 7152758 | 7177090 | 24333 |                            |            |
| r2c1    | NRPS             | 9846    | 57082   | 47237 | Vanchrobactin              | 20%        |
| r2c2    | acyl_amino_acids | 646308  | 706661  | 60354 | Kanamycin                  | 1%         |



**Table S8** Genes attributed to biocontrol, plant growth promotion and colonization traits identified in *Pseudomonas* sp. T1-3-2<sup>T</sup> strain genome.

| <i>Gene</i>  | #gene_ID | VFDB_gene_function/TrEMBL_annotation                                                | Activity                              |
|--------------|----------|-------------------------------------------------------------------------------------|---------------------------------------|
| <i>hcnC</i>  | GE000002 | hydrogen cyanide synthase HcnC                                                      | Production volatile organic compounds |
| <i>hcnB</i>  | GE000004 | hydrogen cyanide synthase HcnB                                                      |                                       |
| <i>hcnC</i>  | GE001730 | FAD dependent oxidoreductase                                                        |                                       |
| <i>hcnA</i>  | GE003656 | Ferredoxin                                                                          |                                       |
| <i>hcnB</i>  | GE003657 | hydrogene cyanide synthase HcnB                                                     |                                       |
| <i>hcnC</i>  | GE003658 | hydrogen cyanide synthase HcnC                                                      |                                       |
| <i>hcnC</i>  | GE003705 | FAD dependent oxidoreductase                                                        |                                       |
| <i>hcnC</i>  | GE003895 | FAD dependent oxidoreductase                                                        |                                       |
| <i>hcnC</i>  | GE005055 | hydrogen cyanide synthase HcnC                                                      |                                       |
| <i>hcnC</i>  | GE007597 | hydrogen cyanide synthase HcnC                                                      |                                       |
| <i>hcnC</i>  | GE007739 | hydrogen cyanide synthase HcnC                                                      |                                       |
| <i>pdhB</i>  | GE004635 | AcoB                                                                                |                                       |
| <i>ilvC</i>  | GE000031 | hypothetical protein                                                                |                                       |
| -            | GE000032 | Acetolactate synthase isozyme 3 small subunit                                       |                                       |
| -            | GE000950 | Acetolactate synthase isozyme 2 large subunit                                       |                                       |
| -            | GE003312 | Acetolactate synthase large subunit                                                 |                                       |
| -            | GE004667 | Acetolactate synthase                                                               |                                       |
| <i>bdh</i>   | GE003968 | meso-butanediol dehydrogenase / (S,S)-butanediol dehydrogenase / diacetyl reductase | Plant growth promotion                |
| -            | GE007338 | meso-butanediol dehydrogenase / (S,S)-butanediol dehydrogenase / diacetyl reductase |                                       |
| <i>trpE1</i> | GE001442 | Anthranilate synthase component I                                                   |                                       |
| <i>trpE2</i> | GE001443 | Anthranilate synthase component I                                                   |                                       |
| <i>trpG</i>  | GE001444 | Anthranilate synthase component II                                                  |                                       |
| <i>trpD</i>  | GE001445 | anthranilate phosphoribosyltransferase                                              |                                       |
| <i>trpC</i>  | GE001446 | indole-3-glycerol phosphate synthase [EC:4.1.1.48]                                  |                                       |
| <i>trpA</i>  | GE000792 | tryptophan synthase alpha chain [EC:4.2.1.20]                                       |                                       |
| <i>trpB</i>  | GE000791 | tryptophan synthase beta chain [EC:4.2.1.20]                                        |                                       |

|                 |          |                                                                                    |                                      |
|-----------------|----------|------------------------------------------------------------------------------------|--------------------------------------|
| <i>phzS</i>     | GE003873 | flavin dependent hydroxylase PhzS                                                  |                                      |
| <i>phzS</i>     | GE004361 | flavin dependent hydroxylase PhzS                                                  |                                      |
| <i>phzS</i>     | GE004399 | flavin dependent hydroxylase PhzS                                                  |                                      |
| <i>phzS</i>     | GE004789 | flavin dependent hydroxylase PhzS                                                  |                                      |
| <i>phzS</i>     | GE005146 | flavin dependent hydroxylase PhzS                                                  |                                      |
| <i>phzH</i>     | GE002430 | phenazine-modifying enzyme                                                         |                                      |
| <i>phzH</i>     | GE006388 | phenazine-modifying enzyme                                                         | Antibiotics and secondary metbolites |
| <i>phzH</i>     | GE006395 | phenazine-modifying enzyme                                                         |                                      |
| <i>phzH</i>     | GE006800 | phenazine-modifying enzyme                                                         |                                      |
| <i>phzG1</i>    | GE006337 | phenazine biosynthesis protein PhzG, pyridoxamine 5'-phosphate oxidase             |                                      |
| <i>phzF1</i>    | GE005721 | phenazine biosynthesis protein PhzF, isomerase                                     |                                      |
| <i>phzE1</i>    | GE001444 | phenazine biosynthesis protein PhzE                                                |                                      |
| <i>phzD1</i>    | GE003827 | phenazine biosynthesis protein PhzD, isochorismatase                               |                                      |
| <i>phzD1</i>    | GE004775 | phenazine biosynthesis protein PhzD, isochorismatase                               |                                      |
| <i>phzC1</i>    | GE002549 | phenazine biosynthesis protein PhzC                                                |                                      |
| <i>phzR</i>     | GE001609 | Transcriptional activator protein PhzR                                             |                                      |
| <i>ubiA</i>     | GE000985 | 4-hydroxybenzoate polyprenyltransferase [EC:2.5.1.39]                              |                                      |
| <i>pys2</i>     | GE006724 | pyocin                                                                             |                                      |
| -               | GE002318 | pyocin R2                                                                          |                                      |
| <i>priN</i>     | GE003123 | Pyocin activator protein                                                           |                                      |
| <i>entD</i>     | GE002181 | Enterobactin synthetase, component D:Phosphopantethiene-protein transferase domain |                                      |
| <i>iucB</i>     | GE005177 | N-acetyltransferase IucB                                                           |                                      |
| <i>bfrD</i>     | GE001765 | Probable TonB-dependent receptor BfrD                                              |                                      |
|                 | GE002255 | Probable TonB-dependent receptor BfrD                                              | Siderophore biosynthesis             |
|                 | GE006409 | Probable TonB-dependent receptor BfrD                                              |                                      |
| <i>bfd</i>      | GE002210 | Bacterioferritin-associated ferredoxin                                             |                                      |
| <i>bfd-like</i> | GE003894 | Sarcosine oxidase subunit alpha                                                    |                                      |
| <i>fiu</i>      | #N/A     | #N/A                                                                               | Siderophore uptake                   |

|               |          |                                                      |                           |
|---------------|----------|------------------------------------------------------|---------------------------|
| <i>exbB</i>   | GE000648 | biopolymer transport protein                         |                           |
| <i>exbD</i>   | GE000647 | biopolymer transport protein                         |                           |
| <i>tonB</i>   | GE003685 | TonB protein                                         |                           |
| <i>pvdA</i>   | GE005179 | L-ornithine N5-oxygenase PvdA                        |                           |
| <i>pvdE</i>   | GE005180 | cyclic peptide transporter                           |                           |
| <i>pvdH</i>   | GE003662 | diaminobutyrate--2-oxoglutarate aminotransferase     |                           |
| <i>pvdL</i>   | GE005189 | peptide synthase                                     |                           |
| <i>pvdG</i>   | GE005186 | putative thioesterase                                |                           |
| <i>pvdS</i>   | GE005167 | ferric regulator PfrI                                |                           |
| <i>pvdJ</i>   | GE003031 | thermophilic carboxylesterase Est2                   | Pyoverdin biosynthesis    |
| <i>pvdO</i>   | GE004492 | protein of unknown function DUF323                   |                           |
| <i>pvdN</i>   | GE002272 | aminotransferase, class V                            |                           |
| <i>pvdM</i>   | GE001313 | renal dipeptidase family protein                     |                           |
| <i>pvdP</i>   | GE005173 | twin-arginine translocation pathway signal           |                           |
| <i>pvdI</i>   | GE000363 | peptide synthase                                     |                           |
| <i>pvdQ</i>   | GE001107 | peptidase S45, penicillin amidase                    |                           |
| <i>menF</i>   | GE004959 | Isochorismate synthase EntC                          |                           |
| <i>pchB</i>   | GE007843 | isochorismate pyruvate lyase                         | Salicylic acid production |
| <i>afuA</i>   | GE000558 | iron(III) transport system substrate-binding protein |                           |
| -             | GE001183 | iron(III) transport system substrate-binding protein |                           |
| -             | GE007513 | iron(III) transport system substrate-binding protein |                           |
| -             | GE007990 | iron(III) transport system substrate-binding protein |                           |
| <i>FbpB</i>   | GE007987 | iron(III) transport system permease protein          | Iron transport, receptors |
| -             | GE007988 | iron(III) transport system permease protein          | and related protein       |
| <i>CysA 2</i> | GE001181 | Sulfate/thiosulfate import ATP-binding protein       |                           |
| <i>FbpC</i>   | GE006219 | Fe(3+) ions import ATP-binding protein FbpC          |                           |
| <i>FbpC1</i>  | GE007507 | Fe(3+) ions import ATP-binding protein FbpC          |                           |
| <i>FbpC2</i>  | GE007986 | Fe(3+) ions import ATP-binding protein FbpC          |                           |

|              |          |                                                                              |                          |
|--------------|----------|------------------------------------------------------------------------------|--------------------------|
| <i>pqqF</i>  | GE001377 | PqqA binding protein                                                         | Phosphate solubilization |
| <i>pqqE</i>  | GE001373 | PqqA peptide cyclase                                                         |                          |
| <i>pqqD1</i> | GE001374 | pyrroloquinoline quinone biosynthesis protein D                              |                          |
| <i>pqqD2</i> | GE006401 | pyrroloquinoline quinone biosynthesis protein D                              |                          |
| <i>pqqC</i>  | GE001375 | pyrroloquinoline-quinone synthase                                            |                          |
| <i>pqqB</i>  | GE001376 | pyrroloquinoline quinone biosynthesis protein B                              |                          |
| <i>pqqA</i>  | #N/A     | pyrroloquinoline quinone biosynthesis protein A                              |                          |
| <i>phnA</i>  | GE001704 | protein PhnA                                                                 |                          |
| -            | GE002436 | Polyphosphate:AMP phosphotransferase                                         |                          |
| -            | GE006535 | Polyphosphate:ADP phosphotransferase                                         |                          |
| -            | GE007292 | Polyphosphate:ADP phosphotransferase                                         |                          |
| <i>phoU</i>  | GE000976 | phosphate transport system protein                                           |                          |
| <i>PstB1</i> | GE000975 | phosphate transport system ATP-binding protein                               |                          |
| <i>PstB2</i> | GE005595 | phosphate transport system ATP-binding protein                               |                          |
| <i>pstA1</i> | GE000974 | phosphate transport system permease protein                                  |                          |
| <i>pstA2</i> | GE005596 | phosphate transport system permease protein                                  |                          |
| <i>pstC1</i> | GE000973 | phosphate transport system permease protein                                  |                          |
| <i>pstC2</i> | GE005597 | phosphate transport system permease protein                                  |                          |
| <i>pstS1</i> | GE000972 | phosphate transport system substrate-binding protein                         |                          |
| <i>pstS2</i> | GE005598 | phosphate transport system substrate-binding protein                         |                          |
| <i>pstS3</i> | GE005615 | phosphate transport system substrate-binding protein                         |                          |
| <i>phoQ1</i> | GE002184 | two-component system.OmpR family. sensor kinase protein                      |                          |
| <i>phoQ2</i> | GE004994 | Virulence sensor histidine kinase PhoQ                                       |                          |
| <i>phoP</i>  | GE002183 | transcriptional regulatory protein PhoP, regulator of virulence determinants |                          |
| -            | GE005723 | low-affinity inorganic phosphate transporter 1                               |                          |
| -            | GE007293 | low-affinity inorganic phosphate transporter 1                               |                          |
| -            | GE007294 | low-affinity inorganic phosphate transporter 1                               |                          |
| <i>pqqL</i>  | GE000540 | Probable alpha-L-glutamate ligase                                            |                          |

|              |          |                                                 |                          |
|--------------|----------|-------------------------------------------------|--------------------------|
| -            | GE000781 | --                                              |                          |
| -            | GE001207 | Uncharacterized zinc protease-like protein y4wB |                          |
| -            | GE005820 | Probable alpha-L-glutamate ligase               |                          |
| <i>gcd</i>   | GE007549 | Quinoprotein glucose dehydrogenase              |                          |
| -            | GE002074 | Quinoprotein glucose dehydrogenase A            |                          |
| -            | GE003161 | Quinoprotein glucose dehydrogenase A            |                          |
| -            | GE004272 | Quinoprotein glucose dehydrogenase A            |                          |
| -            | GE007550 | Glycerol dehydrogenase large subunit            |                          |
| -            | GE003340 | Glycerol dehydrogenase large subunit            |                          |
|              | GE001066 | D-cysteine desulphydrase                        |                          |
| <i>acdS</i>  | GE006028 | 1-aminocyclopropane-1-carboxylate deaminase     | ACC deaminase activity   |
| <i>oxdD</i>  | GE007831 | aldoxime dehydratase                            |                          |
| <i>oxdD</i>  | GE007832 | aldoxime dehydratase                            | IAA production           |
| -            |          | oxidoreductase                                  |                          |
| <i>fixI</i>  | GE002644 | Nitrogen fixation protein                       |                          |
| <i>iscU</i>  | GE006507 | Iron-sulfur cluster assembly scaffold protein   | Nitrogen fixation        |
| -            | GE000456 | glutamine synthetase                            |                          |
| <i>bglX</i>  | GE001991 | beta-glucosidase                                |                          |
| -            | GE005081 | Beta-N-acetylglucosaminidase/beta-glucosidase   |                          |
| <i>BglB1</i> | GE007372 | 6-phospho-beta-glucosidase BglB                 |                          |
| <i>BglB2</i> | GE007373 | 6-phospho-beta-glucosidase                      |                          |
| <i>AscB1</i> | GE007755 | 6-phospho-beta-glucosidase AscB                 |                          |
| <i>AscB2</i> | GE007756 | 6-phospho-beta-glucosidase AscB                 | Lytic enzymes production |
| <i>AscB3</i> | GE007757 | 6-phospho-beta-glucosidase AscB                 |                          |
| -            | GE000998 | endoglucanase                                   |                          |
| -            | GE005135 | endoglucanase                                   |                          |
| <i>nagA1</i> | #N/A     | #N/A                                            |                          |
| <i>pvdQ</i>  | GE001107 | peptidase S45, penicillin amidase               | Quorum quenching         |

|              |          |                                                                       |                                                   |
|--------------|----------|-----------------------------------------------------------------------|---------------------------------------------------|
| <i>manD</i>  | GE004872 | mannitol 2-dehydrogenase                                              | Mannitol dehydrogenase                            |
| <i>rhlB</i>  | GE006625 | ATP-dependent RNA helicase RhlB                                       | Rhamnolipid production                            |
| <i>rhlE</i>  | GE001258 | ATP-dependent RNA helicase RhlE                                       |                                                   |
| <i>rhlE</i>  | GE001624 | ATP-dependent RNA helicase RhlE                                       |                                                   |
| <i>rhlA</i>  | GE002026 | rhamnosyltransferase chain A                                          |                                                   |
| <i>algA</i>  | GE006643 | mannose-1-phosphate guanylyltransferase/mannose-6-phosphate isomerase | Exopolisacharydes biosynthesis<br><i>Alginate</i> |
| <i>algF</i>  | GE006642 | alginate biosynthesis protein AlgF                                    |                                                   |
| <i>algJ</i>  | GE005140 | alginate o-acetyltransferase AlgJ                                     |                                                   |
| <i>algI</i>  | GE005139 | membrane bound O-acyl transferase, MBOAT family protein               |                                                   |
| <i>algL</i>  | GE006639 | poly(beta-D-mannuronate) lyase                                        |                                                   |
| <i>algX</i>  | GE006638 | alginate biosynthesis protein AlgX                                    |                                                   |
| <i>algG</i>  | GE006637 | Carbohydrate binding and sugar hydrolysis                             |                                                   |
| <i>algE</i>  | GE006636 | alginate biosynthesis protein AlgE                                    |                                                   |
| <i>alg44</i> | GE006634 | alginate biosynthesis protein Alg44                                   |                                                   |
| <i>alg8</i>  | GE006633 | glycosyl transferase Alg8                                             |                                                   |
| <i>algD</i>  | GE006632 | GDP-mannose 6-dehydrogenase AlgD                                      |                                                   |
| <i>algI</i>  | GE005139 | membrane bound O-acyl transferase, MBOAT family protein               |                                                   |
| <i>lpxL</i>  | GE000811 | lipid A biosynthesis lauroyl acyltransferase                          | Lypopolysaccharides                               |
| <i>lpxO</i>  | GE004250 | beta-hydroxylase                                                      |                                                   |
| <i>lpxC</i>  | GE001884 | UDP-3-O-acyl N-acetylglucosamine deacetylase                          |                                                   |
| <i>lpxB</i>  | GE002296 | lipid-A-disaccharide synthase                                         |                                                   |
| <i>lpxA</i>  | GE002295 | lpxA                                                                  |                                                   |
| <i>lpxD</i>  | GE002293 | UDP-3-O-[3-hydroxymyristoyl] glucosamine N-acyltransferase            |                                                   |
| <i>lpxH</i>  | GE002671 | UDP-2,3 diacylglucosamine hydrolase                                   |                                                   |
| <i>flhG</i>  | GE006257 | ATPase, ParA family                                                   | Cell Motility                                     |
| <i>flhF</i>  | GE001169 | flagellar biosynthesis protein                                        | <i>Flagllar assembly</i>                          |
| <i>flhA</i>  | GE001168 | flagellar biosynthesis protein                                        |                                                   |

|              |          |                                                         |
|--------------|----------|---------------------------------------------------------|
| <i>flhB</i>  | GE001167 | flagellar biosynthetic protein FlhB                     |
| <i>fliR</i>  | GE001146 | flagellar biosynthetic protein FliR                     |
| <i>fliQ</i>  | GE001147 | flagellar biosynthetic protein FliQ                     |
| <i>fliP</i>  | GE001148 | flagellar biosynthesis protein                          |
| <i>MopB</i>  | GE001149 | flagellar protein FliO/FliZ                             |
| <i>FliO</i>  | GE006080 | flagellar protein FliO/FliZ                             |
| <i>fliNY</i> | GE001150 | lagellar motor switch protein FliN/FliY                 |
| <i>fliNY</i> | GE006081 | lagellar motor switch protein FliN/FliY                 |
| <i>fliM</i>  | GE001151 | flagellar motor switch protein FliM                     |
| <i>fliL</i>  | GE000568 | flagellar basal body protein FliL                       |
| <i>fliK</i>  | GE001153 | flagellar hook-length control protein                   |
| <i>fliJ</i>  | GE001154 | flagellar protein FliJ                                  |
| <i>fliI</i>  | GE001155 | flagellum-specific ATP synthase                         |
| <i>fliH</i>  | GE001156 | flagellar assembly protein                              |
| <i>fliG</i>  | GE001157 | flagellar motor switch protein G                        |
| <i>fliF</i>  | GE001158 | flagellar MS-ring protein                               |
| <i>fliE</i>  | GE001159 | flagellar hook-basal body complex protein FliE          |
| <i>fliS</i>  | GE001161 | flagellar protein FliS                                  |
| <i>fliD</i>  | GE001160 | flagellar capping protein                               |
| <i>fliC</i>  | GE006101 | flagellin FliC                                          |
| <i>flrC</i>  | GE001350 | FlaM                                                    |
| <i>fleQ</i>  | GE006096 | Sigma-54 Specific Transcriptional Regulator, Fis family |
| <i>fleL</i>  | GE001145 | flagellar hook-associated protein 3 FlgL                |
| -            | GE006122 | flagellar hook-associated protein 3 FlgL                |
| <i>flgK</i>  | GE001144 | flagellar hook-associated protein FlgK                  |
| <i>flgJ</i>  | GE001143 | flagellar rod assembly protein/muramidase FlgJ          |
| <i>flgI</i>  | GE001142 | flagellar basal body P-ring protein                     |
| <i>flgH</i>  | GE001141 | flagellar basal body L-ring protein                     |

|                 |          |                                                              |                       |
|-----------------|----------|--------------------------------------------------------------|-----------------------|
| <i>flgG</i>     | GE001140 | flagellar basal-body rod protein FlgG                        |                       |
| <i>flgF</i>     | GE001139 | flagellar basal body rod protein FlgF                        |                       |
| <i>motB</i>     | GE000286 | OmpA/MotB domain protein                                     |                       |
| <i>motA</i>     | GE000287 | chemotaxis MotA protein                                      |                       |
| <hr/>           |          |                                                              |                       |
| <i>pilA/Flp</i> | GE000177 | <i>pilus assembly protein Flp/PilA</i>                       |                       |
| <i>pilJ</i>     | GE000380 | pilus biogenesis protein                                     |                       |
| <i>pilQ</i>     | GE000390 | type II and III secretion system protein:NolW-like:NolW-like |                       |
| <i>pilP</i>     | GE000391 | type IV pilus assembly protein PilP                          |                       |
| <i>pilO</i>     | GE000392 | type IV pilus biogenesis protein PilO                        |                       |
| <i>pilN</i>     | GE000393 | type IV pilus inner membrane platform protein PilN           |                       |
| <i>pilM</i>     | GE000394 | type IV pilus biogenesis protein PilM                        |                       |
| <i>pilT</i>     | GE001227 | twitching motility protein                                   |                       |
| <i>pilG</i>     | GE001238 | type IV pilus response regulator PilG                        |                       |
| <i>pilH</i>     | GE001239 | type IV pilus response regulator PilH                        |                       |
| <i>pilI</i>     | GE001240 | type IV pilus biogenesis protein PilI                        |                       |
| <i>pilV</i>     | GE001725 | hypothetical protein                                         | <i>Pilus assembly</i> |
| <i>pilW</i>     | GE001726 | type IV pilus assembly protein PilW                          |                       |
| <i>pilX</i>     | GE001727 | type IV pilus assembly protein PilX                          |                       |
| <i>PilY1</i>    | GE001728 | type IV pilus assembly protein PilY1                         |                       |
| <i>pilE</i>     | GE001729 | type IV pilus biogenesis protein                             |                       |
| <i>pilD</i>     | GE001747 | type IV pilus prepilin peptidase PilD                        |                       |
| <i>pilC</i>     | GE001748 | type IV pilus biogenesis protein PilC                        |                       |
| <i>pilB</i>     | GE001749 | ype IV pilus biogenesis protein PilB                         |                       |
| <i>PilZ</i>     | GE002594 | type IV pilus assembly protein PilZ                          |                       |
| <i>pilL</i>     | GE003179 | pilus biogenesis protein                                     |                       |
| <i>pilF</i>     | GE006499 | type IV pilus biogenesis protein PilF                        |                       |
| <i>fimA</i>     | GE004881 | major type I subunit fimbrin (pilin)                         |                       |
| <hr/>           |          |                                                              |                       |
| <i>cheY</i>     | GE000672 | chemotaxis protein CheY                                      | <i>Chemotaxis</i>     |



|             |          |                                                                                         |
|-------------|----------|-----------------------------------------------------------------------------------------|
| <i>cheV</i> | GE003084 | chemotaxis protein                                                                      |
| <i>cheB</i> | GE004858 | chemotaxis-specific methylesterase                                                      |
| <i>cheR</i> | GE004859 | chemotaxis protein methyltransferase CheR                                               |
| <i>cheW</i> | GE006062 | purine-binding chemotaxis protein                                                       |
| <i>cheA</i> | GE006068 | two-component sensor                                                                    |
| <i>cheZ</i> | GE006069 | chemotaxis protein CheZ                                                                 |
| <i>cheR</i> | GE006133 | chemotaxis protein methyltransferase CheR                                               |
| <i>wspF</i> | GE006371 | two-component system, chemotaxis family, response regulator                             |
| <i>wspE</i> | GE006372 | two-component system, chemotaxis family, sensor histidine kinase and response regulator |
| <i>wspD</i> | GE006373 | chemotaxis-related protein                                                              |
| <i>wspC</i> | GE006374 | chemotaxis protein methyltransferase                                                    |
| <i>wspB</i> | GE006375 | chemotaxis-related protein                                                              |
| <i>wspA</i> | GE006376 | methyl-accepting chemotaxis protein                                                     |
| <i>aer</i>  | GE002652 | aerotaxis receptor                                                                      |
| <i>aer</i>  | GE006272 | aerotaxis receptor                                                                      |

---

|             |          |                                       |
|-------------|----------|---------------------------------------|
| <i>oxyR</i> | GE002526 | LysR_substrate                        |
| <i>sod2</i> | GE001820 | superoxide dismutase. Fe-Mn family    |
| <i>grxC</i> | GE000465 | glutaredoxin 3                        |
| <i>ggt</i>  | GE003902 | gamma-glutamyltranspeptidase          |
| <i>ggt</i>  | GE001198 | gamma-glutamyltranspeptidase          |
| <i>ggt</i>  | GE000009 | gamma-glutamyltranspeptidase          |
| <i>mlrA</i> | GE000149 | MerR family transcriptional regulator |
| <i>pfpI</i> | GE000753 | Catalase;Catalase-rel;Catalase_C      |
| -           | GE001504 | Catalase;Catalase-rel                 |
| -           | GE002404 | Catalase                              |
| -           | GE004237 | peroxidase                            |
| -           | GE004243 | Catalase;Catalase-rel                 |
| -           | GE005438 | Catalase                              |

Oxidative/Stress response

|              |          |                                    |
|--------------|----------|------------------------------------|
| <i>cotJC</i> | GE005550 | Mn_catalase                        |
| <i>gpx</i>   | GE002234 | Glutathione peroxidase             |
| <i>bsaA</i>  | GE002557 | Glutathione peroxidase homolog     |
| <i>btuE</i>  | GE005624 | Thioredoxin/glutathione peroxidase |
| <i>btuE</i>  | GE006695 | Thioredoxin/glutathione peroxidase |
| -            | GE006953 | Glutathione peroxidase             |
| <i>gsr</i>   | GE004882 | glutathione reductase (NADPH)      |
| <i>gshB</i>  | GE001237 | Glutathione synthetase             |

---
